# Supplementary material for: The Discovery and Characterization of Conserved and Novel miRNAs in the Different Developmental Stages and Organs of Pikeperch (Sander lucioperca)
Source: MDPI journal article supplement (doi:10.3390/ijms25010189), 2023-12-22
Supplement: s1 [file s1]

**Table S6** Primers used in this study.

| <b>Mature miRNA</b>                                                        | <b>Forward primer</b>        |
|----------------------------------------------------------------------------|------------------------------|
| <i>Tested reference miRNAs:</i>                                            |                              |
| slu-mir-26a-1-3-5p                                                         | TTCAAGTAATCCAGGATAGGCT       |
| slu-mir-30-1-2-5p                                                          | TGTAAACATCCTTGACTGGAAGCT     |
| slu-mir-30c-5p                                                             | TGTAAACATCCTACACTCTCAGCT     |
| slu-mir-107-3p                                                             | AGCAGCATTGTACAGGGCTATC       |
| <i>miRNAs particularly abundant or differentially expressed in DESeq2:</i> |                              |
| slu-mir-10b-5p                                                             | TACCCTGTAGAACCGAATGTGT       |
| slu-mir-122-5p                                                             | TGGAGTGTGACAATGGTGTGTTG      |
| slu-mir-130a-5p                                                            | GTCCTTTTTCTGTTGCACTACT       |
| slu-mir-130ab-3p                                                           | CAGTGCAATATTAAGGGCA          |
| slu-mir-202-5p                                                             | TTCCTATGCATATACCTTTTTCAAAAAA |
| slu-mir-203b-3p                                                            | TGAAATGTTTAGGACCACTGA        |
| slu-mir-205-5p                                                             | CTTCATTCCACCGGAGTCTG         |
| slu-mir-551-3p                                                             | GCGACCCATCCTTAGTTTCTG        |
| slu-mir-1388-3p                                                            | CTCAGGTTCGTCAGCCCATG         |
| slu-mir-1388-5p                                                            | AGGACTGTCCAACCTGAGAATG       |
| <i>Hypoxia cluster:</i>                                                    |                              |
| slu-mir-462-5p                                                             | TAACGGAACCCATAATGCAGCTG      |
| slu-mir-731-5p                                                             | AATGACACGTTTTCTCCCGGATT      |
